# Supplementary material for: Genome-wide dynamics of alternative polyadenylation in rice
Source: HighWire-hosted journal article supplement (doi:10.1101/gr.210757.116), 2016-10-12
Supplement: Supplemental_Fig_S1.pdf [file Supplemental_Fig_S1.pdf]

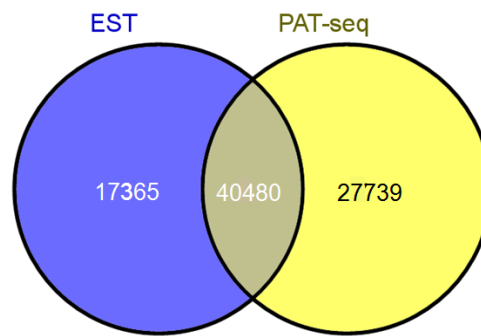

Supplementary Figure 1. Venn diagram of poly(A) site number of PAT-seq was identified by poly(A) site number of EST data.
