# Supplementary material for: Genome-wide dynamics of alternative polyadenylation in rice
Source: HighWire-hosted journal article supplement (doi:10.1101/gr.210757.116), 2016-10-12
Supplement: Supplemental_Fig_S2.pdf [file Supplemental_Fig_S2.pdf]

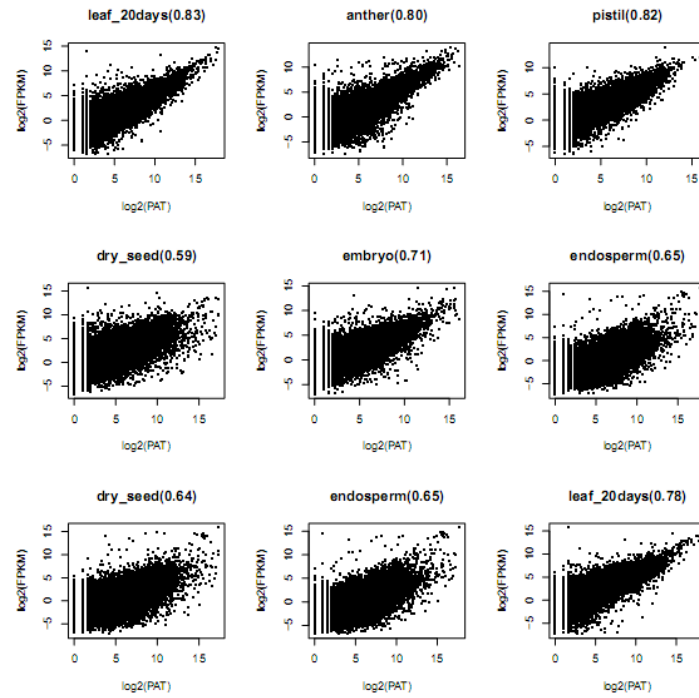

Supplementary Figure 2. Comparison of mRNA abundance levels of samples obtained by PAT-seq (x-axis,  $\log_2(\text{PAT})$ ) with published RNA-seq data (y-axis,  $\log_2(\text{RPKM})$ ). The Pearson correlation coefficients are shown for each comparison.
