# Supplementary material for: Genome-wide dynamics of alternative polyadenylation in rice
Source: HighWire-hosted journal article supplement (doi:10.1101/gr.210757.116), 2016-10-12
Supplement: Supplemental_Fig_S3.pdf [file Supplemental_Fig_S3.pdf]

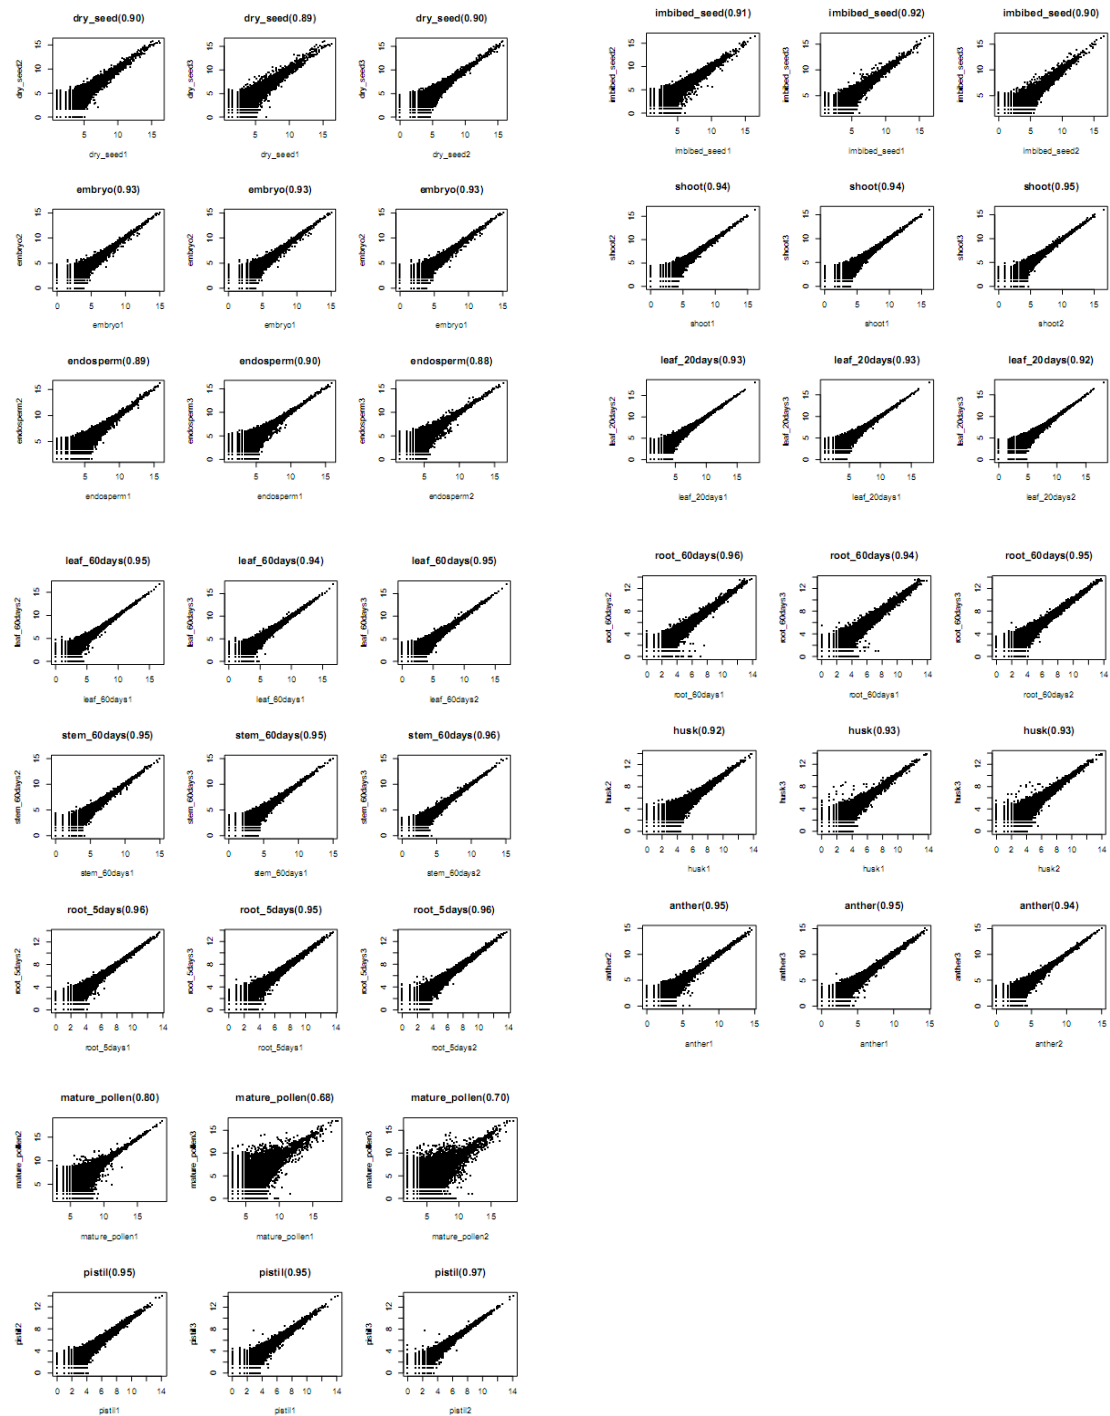

Supplementary Figure 3. PAT-seq is reproducible at the level of poly(A) site abundance. The Pearson's correlation coefficient is reported. Log-transformed PAT levels are shown.
