# Supplementary material for: Genome-wide dynamics of alternative polyadenylation in rice
Source: HighWire-hosted journal article supplement (doi:10.1101/gr.210757.116), 2016-10-12
Supplement: Supplemental_Fig_S5.pdf [file Supplemental_Fig_S5.pdf]

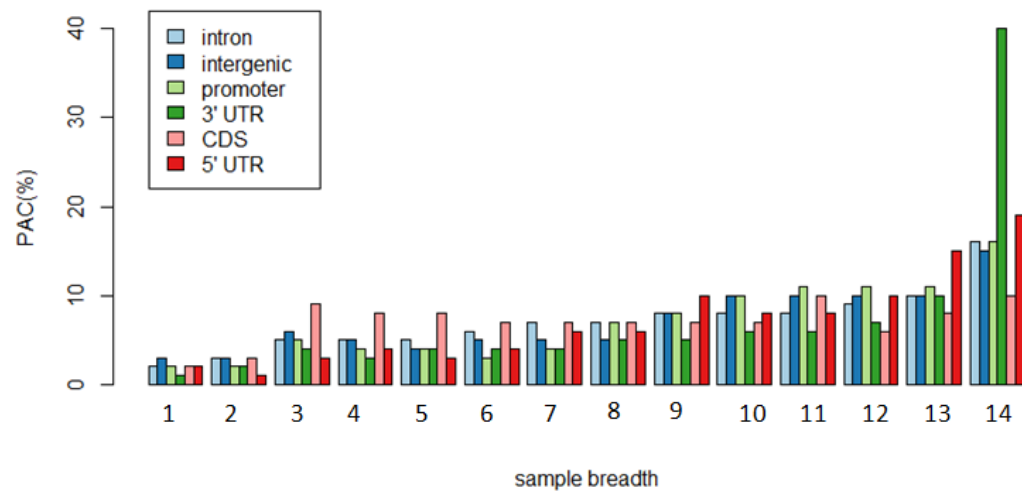

Supplementary Figure 5. Number of tissues/samples where a PAC is expressed, reflecting specificity of PAC distributions at the sample level.
