# Supplementary material for: Genome-wide dynamics of alternative polyadenylation in rice
Source: HighWire-hosted journal article supplement (doi:10.1101/gr.210757.116), 2016-10-12
Supplement: Supplemental_Fig_S6.pdf [file Supplemental_Fig_S6.pdf]

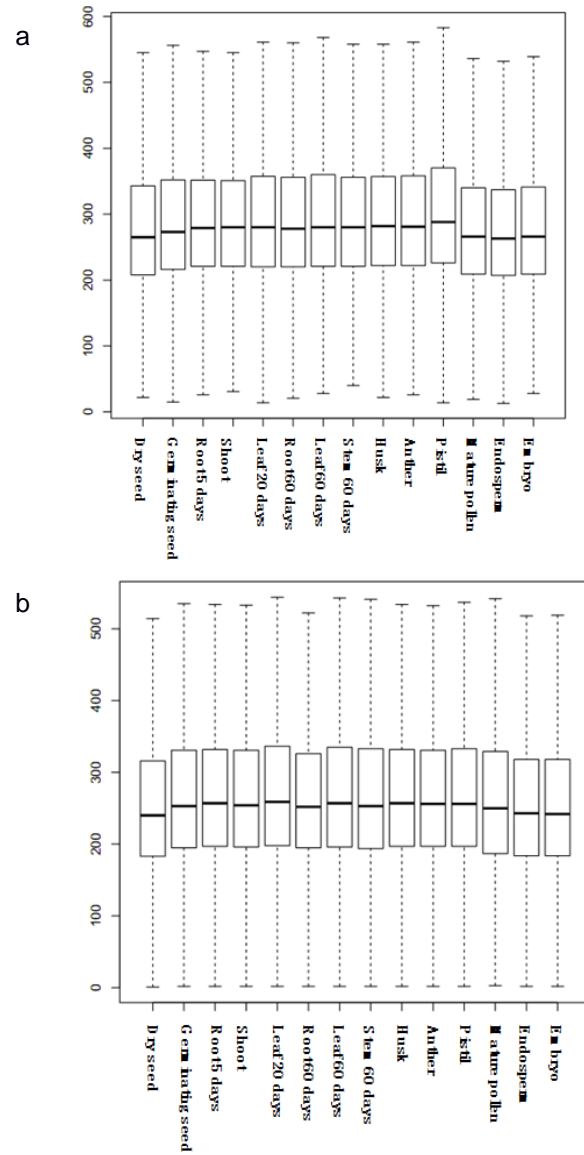

Supplementary Figure 6. Average 3' UTR length. (a) Genes with multiple 3' UTR PACs. (b) Genes with single 3' UTR PAC.
