# Supplementary material for: Genome-wide dynamics of alternative polyadenylation in rice
Source: HighWire-hosted journal article supplement (doi:10.1101/gr.210757.116), 2016-10-12
Supplement: Supplemental_Fig_S7.pdf [file Supplemental_Fig_S7.pdf]

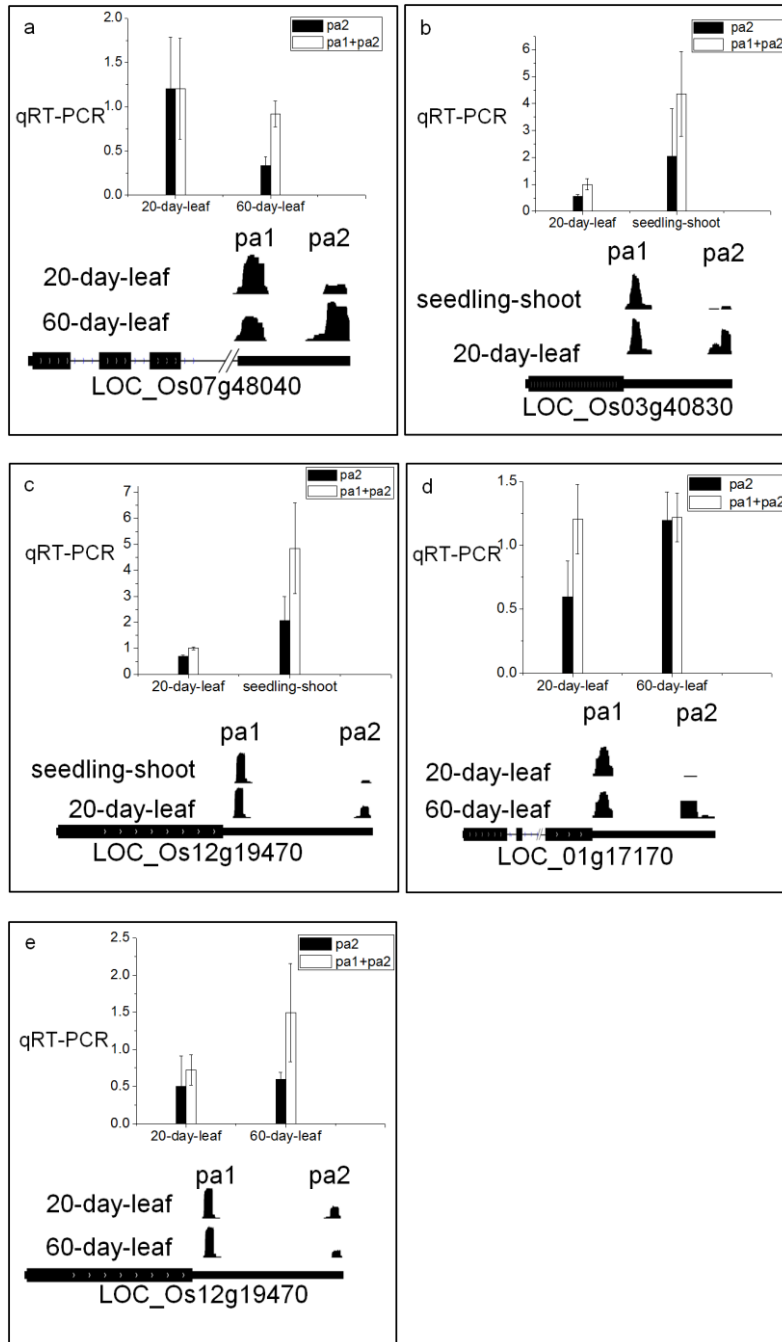

Supplementary Figure 7. APA switching gene is biased toward proximal and distal poly(A) site usage. PAT-seq tracks for five genes expressed in the development of rice that become longer and shorter. QRT-PCR demonstrates 3' UTR longer (a-d) and shorter (e) in the development of rice. PA2 was derive from long 3' UTR isoforms, PA1+PA2 was short and long 3' UTR isoforms. Y axes represents relative normalized expression.
