# Supplementary material for: Genome-wide dynamics of alternative polyadenylation in rice
Source: HighWire-hosted journal article supplement (doi:10.1101/gr.210757.116), 2016-10-12
Supplement: Supplemental_Fig_S8.pdf [file Supplemental_Fig_S8.pdf]

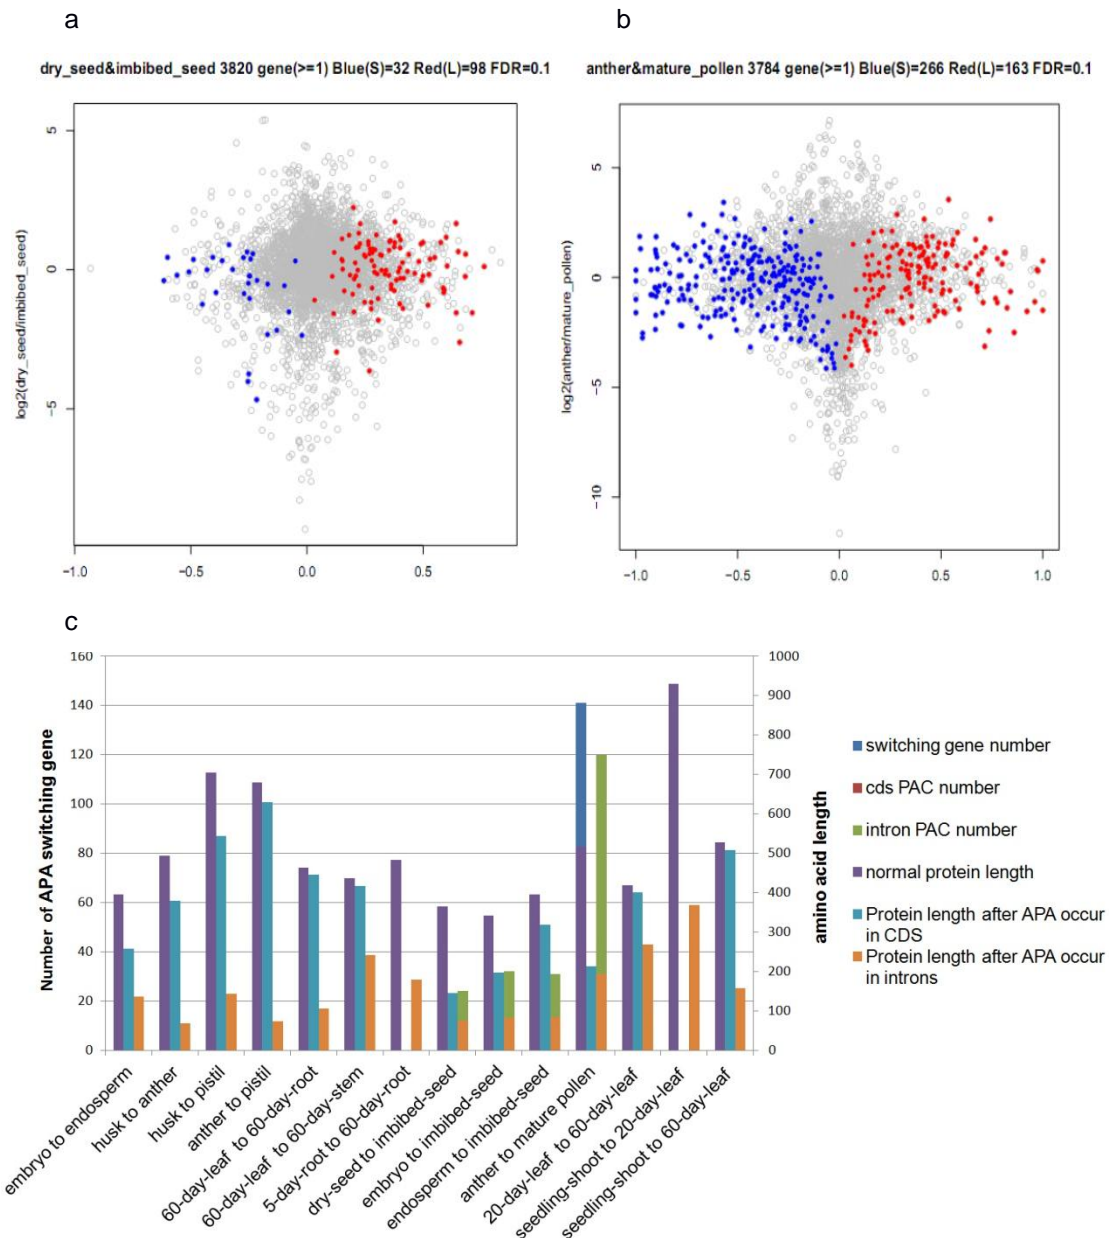

Supplementary Figure 8. APA site switching genes during the developmental stages of rice. (a) From dry seed to imbibed seed. (b) From anther to pollen. (c) APA switching genes in CDS and intron between two stages as well as resulting protein length alteration before and after switching. Blue dots indicate shorter 3'UTR, red dots are longer 3'UTR when compared from one tissue to the other. The value of vertical ordinate and abscissa all represent the log of 3'UTR length of genes.
