# Supplementary material for: Genome-wide dynamics of alternative polyadenylation in rice
Source: HighWire-hosted journal article supplement (doi:10.1101/gr.210757.116), 2016-10-12
Supplement: Supplemental_Fig_S9.pdf [file Supplemental_Fig_S9.pdf]

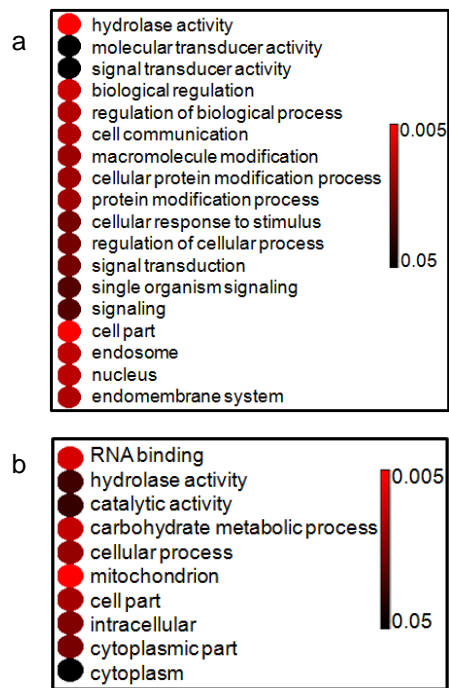

Supplementary Figure 9. GO analyses of APA switching genes between anther and mature pollen. (a) 3'UTR switching. (b) Non-3'UTR switching. Color scale bar represents p-value.
