# Supplementary material for: Genome-wide dynamics of alternative polyadenylation in rice
Source: HighWire-hosted journal article supplement (doi:10.1101/gr.210757.116), 2016-10-12
Supplement: Supplemental_Fig_S10.pdf [file Supplemental_Fig_S10.pdf]

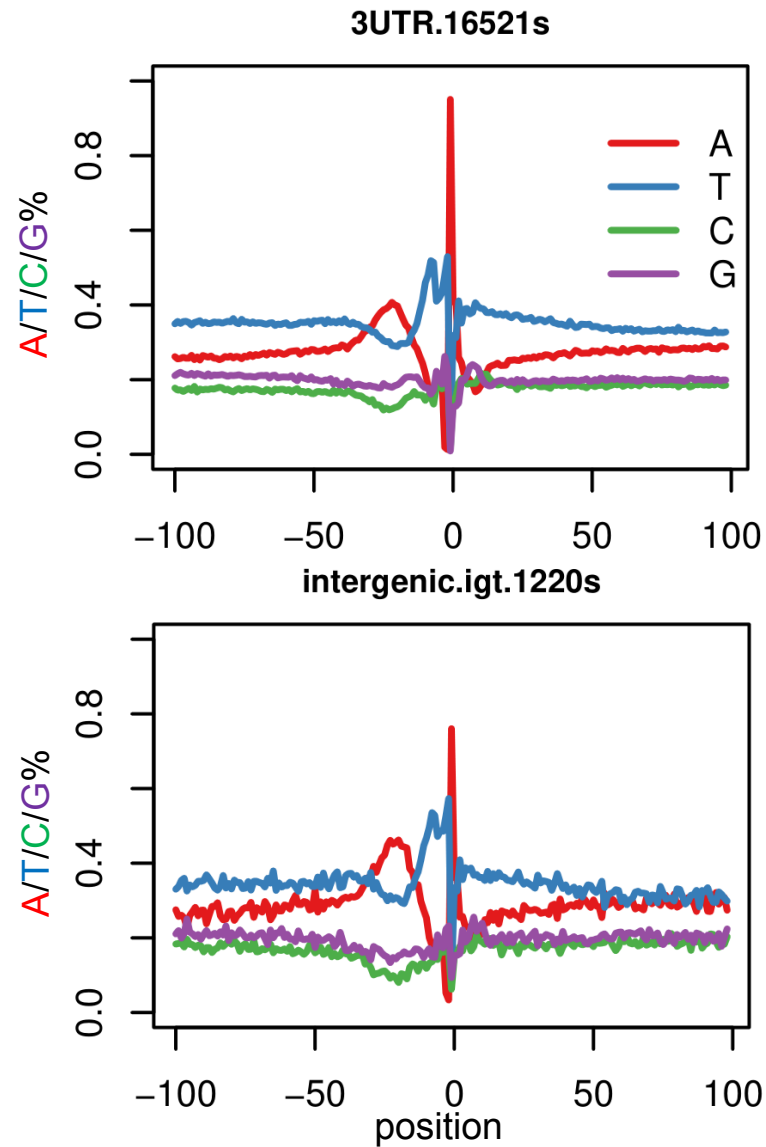

Supplementary Figure 10. Single nucleotide profile around PACs in 3'UTR and intergenic regions. The numbers next to the panel title indicate sequences used for the analysis. Refer to Fig. 2A for more details.
