# Supplementary material for: Genome-wide dynamics of alternative polyadenylation in rice
Source: HighWire-hosted journal article supplement (doi:10.1101/gr.210757.116), 2016-10-12
Supplement: Supplemental_Table_S4.pdf [file Supplemental_Table_S4.pdf]

Supplementary Table 4. Wilcox test of 3'UTR length by pair-wise comparison

| Samples                       | APA gene | Non-APA gene | Samples                          | APA gene | Non-APA gene |
|-------------------------------|----------|--------------|----------------------------------|----------|--------------|
| pistil vs. endosperm          | 7.70E-19 | 2.30E-05     | 60-day-stem vs. mature-pollen    | 7.15E-08 | 4.93E-14     |
| pistil vs. mature-pollen      | 8.40E-17 | 9.07E-11     | dry-seed vs. 60-day-stem         | 8.97E-08 | 1.52E-64     |
| dry-seed vs. pistil           | 8.90E-16 | 1.23E-79     | 5-day-sroot vs. mature-pollen    | 1.02E-07 | 1.12E-10     |
| pistil vs. embryo             | 7.45E-15 | 2.73E-07     | dry-seed vs. 5-day-sroot         | 1.12E-07 | 2.81E-66     |
| anther vs. endosperm          | 6.12E-13 | 5.94E-06     | seedling-shoot vs. mature-pollen | 1.20E-07 | 2.17E-12     |
| husk vs. endosperm            | 3.42E-12 | 2.67E-05     | dry-seed vs. seedling-shoot      | 1.68E-07 | 1.26E-71     |
| 20-day-leaf vs. endosperm     | 4.47E-12 | 3.35E-03     | 60-day-stem vs. embryo           | 4.11E-07 | 1.25E-09     |
| 60-day-leaf vs. endosperm     | 4.15E-11 | 7.44E-05     | 5-day-sroot vs. embryo           | 5.29E-07 | 2.94E-07     |
| anther vs. mature-pollen      | 8.87E-11 | 1.27E-11     | seedling-shoot vs. embryo        | 8.15E-07 | 1.98E-08     |
| dry-seed vs. anther           | 2.54E-10 | 8.97E-76     | dry-seed vs. 60-day-sroot        | 8.65E-07 | 5.58E-64     |
| husk vs. mature-pollen        | 4.39E-10 | 1.42E-10     | 60-day-sroot vs. mature-pollen   | 1.00E-06 | 4.90E-18     |
| 20-day-leaf vs. mature-pollen | 5.96E-10 | 1.29E-06     | imbibed-seed vs. pistil          | 1.80E-06 | 8.81E-43     |
| 60-day-stem vs. endosperm     | 7.38E-10 | 1.44E-07     | 60-day-sroot vs. embryo          | 3.86E-06 | 2.87E-12     |
| 5-day-sroot vs. endosperm     | 8.62E-10 | 2.29E-05     | imbibed-seed vs. endosperm       | 2.18E-05 | 1.82E-07     |
| seedling-shoot vs. endosperm  | 1.14E-09 | 1.91E-06     | dry-seed vs. imbibed-seed        | 4.61E-04 | 2.19E-54     |
| dry-seed vs. husk             | 1.14E-09 | 6.55E-76     | seedling-shoot vs. pistil        | 5.60E-04 | 1.42E-41     |
| anther vs. embryo             | 1.62E-09 | 6.34E-08     | 60-day-sroot vs. pistil          | 5.68E-04 | 2.99E-49     |
| dry-seed vs. 20-day-leaf      | 1.70E-09 | 2.95E-79     | imbibed-seed vs. mature-pollen   | 9.62E-04 | 1.03E-13     |
| 60-day-leaf vs. mature-pollen | 4.52E-09 | 1.66E-09     | imbibed-seed vs. embryo          | 1.40E-03 | 1.63E-09     |
| husk vs. embryo               | 7.01E-09 | 3.49E-07     | 5-day-sroot vs. pistil           | 1.73E-03 | 9.00E-40     |
| dry-seed vs. 60-day-leaf      | 8.11E-09 | 5.38E-72     | 60-day-stem vs. pistil           | 3.88E-03 | 4.91E-43     |
| 20-day-leaf vs. embryo        | 9.59E-09 | 1.12E-04     | imbibed-seed vs. anther          | 5.14E-03 | 2.89E-36     |
| 60-day-sroot vs. endosperm    | 1.03E-08 | 6.12E-10     | 20-day-leaf vs. pistil           | 7.29E-03 | 2.50E-32     |
| 60-day-leaf vs. embryo        | 4.48E-08 | 1.30E-06     | 60-day-leaf vs. pistil           | 8.34E-03 | 9.74E-37     |
