# Supplementary material for: Genome-wide dynamics of alternative polyadenylation in rice
Source: HighWire-hosted journal article supplement (doi:10.1101/gr.210757.116), 2016-10-12
Supplement: Supplemental_Table_S9.pdf [file Supplemental_Table_S9.pdf]

Supplemental Table 9. Tissue samples of the rice under study

| Sample             | Germinating stage | Seedling stage | Tillering stage | Booting stage | Heading stage | Mature stage |
|--------------------|-------------------|----------------|-----------------|---------------|---------------|--------------|
| root               |                   | √              |                 | √             |               |              |
| culm               |                   |                |                 | √             |               |              |
| shoot              |                   | √              |                 |               |               |              |
| leaf               |                   |                | √               | √             |               |              |
| embryo             |                   |                |                 |               |               | √            |
| endosperm          |                   |                |                 |               |               | √            |
| dry-seed           |                   |                |                 |               |               | √            |
| 24 hr imbibed seed | √                 |                |                 |               |               |              |
| husk               |                   |                |                 | √             |               |              |
| pollen             |                   |                |                 |               | √             |              |
| anther             |                   |                |                 | √             |               |              |
| pistil             |                   |                |                 | √             |               |              |
